# Supplementary material for: Effect of Silver Modification on the Photoactivity of Titania Coatings with Different Pore Structures
Source: MDPI journal article supplement (doi:10.3390/nano11092240), 2021-08-30
Supplement: s1 [file s1]

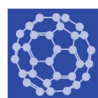

## Supporting information

# Effect of Silver Modification on the Photoactivity of Titania Coatings with Different Pore Structures

Borbála Tegze <sup>1</sup>, Emőke Albert <sup>1</sup>, Boglárka Dikó <sup>1</sup>, Norbert Nagy <sup>2</sup>, Adél Rác <sup>2</sup>, György Sáfrán <sup>2</sup>, Attila Sulyok <sup>2</sup> and Zoltán Hórvölgyi <sup>1,\*</sup>

## S.1. XPS measurements

**Table S1.** Composition observed by X-ray photoelectron spectroscopy (XPS) measurements. Surface values show the composition at the very surface calculated using a homogeneous distribution model. Bulk values refer to the quantities determined by XPS after removing the surface atomic layers by ion sputtering.

|                             |         | Na (at%) | O (at%) | Ti (at%) | Ag (at%) | Si (at%) |
|-----------------------------|---------|----------|---------|----------|----------|----------|
| p-TiO <sub>2</sub>          | surface | 2.1      | 74.3    | 23.2     | -        | 0.4      |
|                             | bulk    | 0.7      | 72.4    | 25.4     | -        | 1.4      |
| p-TiO <sub>2</sub> (0.03Ag) | surface | 5.2      | 72.8    | 18.4     | 0.1      | 3.5      |
|                             | bulk    | 3.4      | 69.4    | 23.5     | 0.1      | 3.0      |
| p-TiO <sub>2</sub> (1Ag)    | surface | 2.1      | 71.6    | 23.5     | 0.3      | 2.5      |
|                             | bulk    | 0.8      | 72.3    | 24.8     | 0.3      | 1.7      |
| p-TiO <sub>2</sub> -Ag      | surface | 2.4      | 74.5    | 20.2     | 1.2      | 1.7      |
|                             | bulk    | 1.9      | 70.5    | 24.9     | 1.5      | 1.1      |
| c-TiO <sub>2</sub>          | surface | 9.8      | 65.3    | 20.9     | -        | 4.0      |
|                             | bulk    | 3.3      | 70.4    | 24.0     | -        | 2.3      |
| c-TiO <sub>2</sub> (0.03Ag) | surface | 3.4      | 70.8    | 23.0     | 0.2      | 2.7      |
|                             | bulk    | 1.6      | 72.1    | 24.7     | 0.1      | 1.4      |
| c-TiO <sub>2</sub> (1Ag)    | surface | 2.6      | 70.4    | 23.8     | 0.8      | 2.4      |
|                             | bulk    | 1.1      | 72.8    | 24.2     | 0.8      | 2.0      |

## S.2. Wettability measurements

**Table S2.** Advancing ( $\Theta_A$ ) and receding ( $\Theta_R$ ) contact angles, Young's contact angle ( $\Theta_{\text{Young}}$ ) and contact angle hysteresis (H) measured on TiO<sub>2</sub> and TiO<sub>2</sub>-Ag composite coatings.

| Sample                      |            | $\Theta_A$ (°) | $\Theta_R$ (°) | $\Theta_{\text{Young}}$ (°) | H (°)   |
|-----------------------------|------------|----------------|----------------|-----------------------------|---------|
| c-TiO <sub>2</sub>          | initial    | 28 ± 6         | 16 ± 2         | 23 ± 4                      | 12 ± 5  |
|                             | 10 min UV  | 0              | 0              | 0                           | 0       |
|                             | 30 min Vis | 11 ± 11        | 1 ± 2          | 13 ± 10                     | 10 ± 7  |
|                             | 1 day dark | 43 ± 3         | 22 ± 2         | 34 ± 3                      | 21 ± 2  |
|                             | 10 min UV  | 0              | 0              | 0                           | 0       |
|                             | 30 min Vis | 45 ± 4         | 25 ± 4         | 36 ± 4                      | 20 ± 2  |
| c-TiO <sub>2</sub> (0.03Ag) | initial    | 30 ± 2         | 19 ± 6         | 25 ± 3                      | 11 ± 4  |
|                             | 10 min UV  | 3 ± 4          | 0              | 2 ± 3                       | 3 ± 4   |
|                             | 30 min Vis | 26 ± 9         | 12 ± 7         | 20 ± 7                      | 14 ± 3  |
|                             | 1 day dark | 42 ± 4         | 21 ± 3         | 33 ± 3                      | 21 ± 2  |
|                             | 10 min UV  | 0              | 0              | 0                           | 0       |
|                             | 30 min Vis | 63 ± 13        | 37 ± 9         | 51 ± 11                     | 26 ± 4  |
| c-TiO <sub>2</sub> (1Ag)    | initial    | 36 ± 3         | 24 ± 3         | 30 ± 1                      | 12 ± 6  |
|                             | 10 min UV  | 4 ± 4          | 0              | 3 ± 3                       | 4 ± 4   |
|                             | 30 min Vis | 26 ± 8         | 11 ± 4         | 20 ± 6                      | 15 ± 4  |
|                             | 1 day dark | 44 ± 5         | 23 ± 4         | 35 ± 4                      | 21 ± 1  |
|                             | 10 min UV  | 0              | 0              | 0                           | 0       |
|                             | 30 min Vis | 49 ± 4         | 27 ± 3         | 40 ± 3                      | 22 ± 2  |
| p-TiO <sub>2</sub>          | initial    | 16 ± 1         | 0              | 11 ± 1                      | 16 ± 1  |
|                             | 10 min UV  | 0              | 0              | 0                           | 0       |
|                             | 30 min Vis | 19 ± 15        | 9 ± 8          | 15 ± 12                     | 10 ± 8  |
|                             | 1 day dark | 35 ± 4         | 17 ± 3         | 27 ± 4                      | 21 ± 5  |
|                             | 10 min UV  | 5 ± 8          | 0              | 4 ± 6                       | 5 ± 8   |
|                             | 30 min Vis | 15 ± 24        | 9 ± 14         | 13 ± 19                     | 7 ± 10  |
| p-TiO <sub>2</sub> (0.03Ag) | initial    | 15 ± 5         | 0              | 10 ± 3                      | 15 ± 5  |
|                             | 10 min UV  | 3 ± 3          | 0              | 2 ± 2                       | 3 ± 3   |
|                             | 30 min Vis | 25 ± 9         | 11 ± 8         | 19 ± 8                      | 14 ± 3  |
|                             | 1 day dark | 31 ± 4         | 17 ± 2         | 25 ± 3                      | 14 ± 4  |
|                             | 10 min UV  | 9 ± 7          | 0              | 7 ± 4                       | 10 ± 6  |
|                             | 30 min Vis | 35 ± 14        | 12 ± 13        | 27 ± 13                     | 21 ± 3  |
| p-TiO <sub>2</sub> (1Ag)    | initial    | 11 ± 10        | 0              | 8 ± 7                       | 11 ± 10 |
|                             | 10 min UV  | 7 ± 1          | 0              | 5 ± 1                       | 7 ± 1   |
|                             | 30 min Vis | 25 ± 3         | 11 ± 2         | 19 ± 2                      | 14 ± 3  |
|                             | 1 day dark | 37 ± 4         | 19 ± 2         | 29 ± 4                      | 20 ± 4  |
|                             | 10 min UV  | 4 ± 7          | 0              | 4 ± 5                       | 6 ± 7   |
|                             | 30 min Vis | 26 ± 9         | 13 ± 8         | 20 ± 9                      | 15 ± 3  |
| p-TiO <sub>2</sub> -Ag      | initial    | 21 ± 3         | 7 ± 2          | 16 ± 2                      | 14 ± 2  |
|                             | 10 min UV  | 12 ± 9         | 0              | 8 ± 6                       | 12 ± 9  |
|                             | 30 min Vis | 50 ± 6         | 28 ± 3         | 40 ± 5                      | 22 ± 4  |
|                             | 1 day dark | 49 ± 2         | 26 ± 2         | 39 ± 2                      | 23 ± 1  |
|                             | 10 min UV  | 16 ± 13        | 6 ± 5          | 12 ± 9                      | 10 ± 8  |
|                             | 30 min Vis | 56 ± 7         | 30 ± 4         | 45 ± 5                      | 26 ± 4  |

### S.3. Degradation rate constants

**Table S3.** Degradation rate constants ( $k_{m1}$ ,  $k_{m2}$ ) of rhodamine 6G and methylene blue monomer photodegradation under visible and UV irradiation, determined by the Julson-Ollis model.

| irradiation    | parameters                           | c-TiO <sub>2</sub> | c-TiO <sub>2</sub> (0.03Ag) | c-TiO <sub>2</sub> (1Ag) |                        |
|----------------|--------------------------------------|--------------------|-----------------------------|--------------------------|------------------------|
| Rhodamine 6G   |                                      |                    |                             |                          |                        |
| Vis            | k <sub>m1</sub> [min <sup>-1</sup> ] | 0.032 ± 0.003      | 0.038 ± 0.007               | 0.048 ± 0.007            |                        |
|                | k <sub>m2</sub> [min <sup>-1</sup> ] | 0.0019 ± 0.0001    | 0.0031 ± 0.0002             | 0.0032 ± 0.0003          |                        |
| UV             | k <sub>m1</sub> [min <sup>-1</sup> ] | 0.1709 ± 0.0004    | 0.35 ± 0.02                 | 0.254 ± 0.005            |                        |
|                | k <sub>m2</sub> [min <sup>-1</sup> ] | 0.0260 ± 0.0003    | 0.043 ± 0.004               | 0.036 ± 0.002            |                        |
| Methylene blue |                                      |                    |                             |                          |                        |
| UV             | k <sub>m1</sub> [min <sup>-1</sup> ] | 0.042 ± 0.003      | 0.043 ± 0.002               | 0.037 ± 0.005            |                        |
|                | k <sub>m2</sub> [min <sup>-1</sup> ] | 0.0026 ± 0.0001    | 0.0026 ± 0.0002             | 0.0020 ± 0.0002          |                        |
| irradiation    | parameters                           | p-TiO <sub>2</sub> | p-TiO <sub>2</sub> (0.03Ag) | p-TiO <sub>2</sub> (1Ag) | p-TiO <sub>2</sub> -Ag |
| Rhodamine 6G   |                                      |                    |                             |                          |                        |
| Vis            | k <sub>m1</sub> [min <sup>-1</sup> ] | 0.07 ± 0.01        | 0.066 ± 0.008               | 0.047 ± 0.004            | 0.032 ± 0.001          |
|                | k <sub>m2</sub> [min <sup>-1</sup> ] | 0.0042 ± 0.0002    | 0.00494 ± 0.00004           | 0.0036 ± 0.0004          | 0.0023 ± 0.0006        |
| UV             | k <sub>m1</sub> [min <sup>-1</sup> ] | 0.26 ± 0.02        | 0.201 ± 0.001               | 0.21 ± 0.06              | 0.41 ± 0.08            |
|                | k <sub>m2</sub> [min <sup>-1</sup> ] | 0.051 ± 0.002      | 0.03305 ± 0.00003           | 0.03 ± 0.01              | 0.044 ± 0.003          |
| Methylene blue |                                      |                    |                             |                          |                        |
| UV             | k <sub>m1</sub> [min <sup>-1</sup> ] | 0.0527 ± 0.0007    | 0.0574 ± 0.0099             | 0.045 ± 0.004            | 0.025 ± 0.008          |
|                | k <sub>m2</sub> [min <sup>-1</sup> ] | 0.0047 ± 0.0001    | 0.0048 ± 0.0007             | 0.0045 ± 0.0003          | 0.0020 ± 0.0003        |

**Table S4.** Degradation rate constants of rhodamine 6G monomer ( $k_{m1}$ ,  $k_{m2}$ ) and dimer ( $k_{d1}$ ,  $k_{d2}$ ,  $k_{dt}$ ) photodegradation under visible and UV irradiation, determined by pseudo-first order model.

| irradiation | parameters                           | c-TiO <sub>2</sub> | c-TiO <sub>2</sub> (0.03Ag) | c-TiO <sub>2</sub> (1Ag) |                        |
|-------------|--------------------------------------|--------------------|-----------------------------|--------------------------|------------------------|
| Vis         | k <sub>m1</sub> [min <sup>-1</sup> ] | 0.00745 ± 0.00069  | 0.00856 ± 0.00073           | 0.0106 ± 0.0019          |                        |
|             | k <sub>m2</sub> [min <sup>-1</sup> ] | 0.00270 ± 0.00009  | 0.00351 ± 0.00023           | 0.00323 ± 0.00019        |                        |
|             | k <sub>d1</sub> [min <sup>-1</sup> ] | 0.00396 ± 0.00027  | 0.00365 ± 0.00022           | 0.00513 ± 0.00122        |                        |
|             | k <sub>d2</sub> [min <sup>-1</sup> ] | 0.00259 ± 0.00019  | 0.00354 ± 0.00033           | 0.00302 ± 0.00036        |                        |
|             | k <sub>dt</sub> [min <sup>-1</sup> ] | 0.00295 ± 0.00004  | 0.00388 ± 0.00019           | 0.00356 ± 0.00032        |                        |
| UV          | k <sub>m1</sub> [min <sup>-1</sup> ] | 0.0635 ± 0.0005    | 0.112 ± 0.004               | 0.0876 ± 0.0021          |                        |
|             | k <sub>m2</sub> [min <sup>-1</sup> ] | 0.0372 ± 0.0004    | 0.0489 ± 0.0025             | 0.0448 ± 0.0035          |                        |
|             | k <sub>d1</sub> [min <sup>-1</sup> ] | 0.0325 ± 0.0009    | 0.0557 ± 0.0019             | 0.0429 ± 0.0033          |                        |
|             | k <sub>d2</sub> [min <sup>-1</sup> ] | 0.0378 ± 0.0008    | 0.0502 ± 0.0017             | 0.0458 ± 0.0027          |                        |
|             | k <sub>dt</sub> [min <sup>-1</sup> ] | 0.0374 ± 0.0015    | 0.0542 ± 0.0018             | 0.0457 ± 0.0003          |                        |
| irradiation | parameters                           | p-TiO <sub>2</sub> | p-TiO <sub>2</sub> (0.03Ag) | p-TiO <sub>2</sub> (1Ag) | p-TiO <sub>2</sub> -Ag |
| Vis         | k <sub>m1</sub> [min <sup>-1</sup> ] | 0.0125 ± 0.0013    | 0.0125 ± 0.0009             | 0.0103 ± 0.0004          | 0.0078 ± 0.0005        |
|             | k <sub>m2</sub> [min <sup>-1</sup> ] | 0.00404 ± 0.00031  | 0.00482 ± 0.00001           | 0.00390 ± 0.00037        | 0.00312 ± 0.00066      |
|             | k <sub>d1</sub> [min <sup>-1</sup> ] | 0.00489 ± 0.00172  | 0.00382 ± 0.00067           | 0.00325 ± 0.00024        | 0.00134 ± 0.00043      |
|             | k <sub>d2</sub> [min <sup>-1</sup> ] | 0.00431 ± 0.00044  | 0.00500 ± 0.00001           | 0.00381 ± 0.00027        | 0.00266 ± 0.00094      |
|             | k <sub>dt</sub> [min <sup>-1</sup> ] | 0.00474 ± 0.00024  | 0.00539 ± 0.00020           | 0.00361 ± 0.00030        | 0.00261 ± 0.00094      |
| UV          | k <sub>m1</sub> [min <sup>-1</sup> ] | 0.0939 ± 0.0071    | 0.0738 ± 0.0003             | 0.0739 ± 0.0182          | 0.117 ± 0.014          |
|             | k <sub>m2</sub> [min <sup>-1</sup> ] | 0.0568 ± 0.0018    | 0.0404 ± 0.0013             | 0.0417 ± 0.0093          | 0.0490 ± 0.0017        |
|             | k <sub>d1</sub> [min <sup>-1</sup> ] | 0.0449 ± 0.0064    | 0.0205 ± 0.0009             | 0.0181 ± 0.0160          | 0.0472 ± 0.0090        |
|             | k <sub>d2</sub> [min <sup>-1</sup> ] | 0.0595 ± 0.0018    | 0.0400 ± 0.0024             | 0.0410 ± 0.0125          | 0.0521 ± 0.0004        |
|             | k <sub>dt</sub> [min <sup>-1</sup> ] | 0.0565 ± 0.0021    | 0.036 ± 0.0016              | 0.0375 ± 0.0126          | 0.0510 ± 0.0034        |

#### S.4. Quantum efficiency and quantum yield values

Quantum efficiency and quantum yield values were determined for the initial interval of R6G monomer degradation, under both UV and visible light (see in Table S5). Quantum efficiency (QE) is defined as the ratio between the number of degraded molecules/cm<sup>2</sup> and the number of incident photons/cm<sup>2</sup>, while quantum yield (QY) is the ratio between the number of degraded molecules/cm<sup>2</sup> and the number of absorbed photons/cm<sup>2</sup>. The total number of R6G dye molecules present in the dye impregnated coatings were estimated from dye desorption measurements. 3-3 samples of the different coatings were measured, by immersing a coating in 30 mL of distilled water, waiting 24 h for the desorption of dye molecules (equilibrium was reached, and it can be assumed that only a negligible amount of the dye molecules remained in the pore structure), then determining the concentration of the resulting dye solutions using the Lambert-Beer equation. The number of degraded dye molecules/cm<sup>2</sup> was then calculated using this result, and the degradation rates measured in the photodegradation experiments, and the area of the coatings. The number of incident photons/cm<sup>2</sup> was determined from the measured intensity of the lamps (at suitable wavelength values for the UV and visible light measurements). The number of absorbed photons/cm<sup>2</sup> was then calculated from this value by determining the percentage of absorbed light from UV-Vis spectroscopy measurements of different dye impregnated TiO<sub>2</sub> and TiO<sub>2</sub>-Ag coatings (for the visible light measurements), and of titania coatings on quartz glass substrate (for the UV measurements). The percentage of absorbed light at a certain wavelength was estimated from the transmittance spectra and corrected with the reflectance. A more detailed description of the above summarized calculation process can be read in our previous publication [1].

**Table S5.** Quantum efficiency and quantum yield values of R6G monomer degradation (first interval) under visible and UV light.

|                             | Quantum efficiency (%) |       | Quantum yield (%) |      |
|-----------------------------|------------------------|-------|-------------------|------|
|                             | Vis                    | UV    | Vis               | UV   |
| p-TiO <sub>2</sub>          | 0.00742                | 0.189 | 0.0371            | 3.09 |
| p-TiO <sub>2</sub> (0.03Ag) | 0.00828                | 0.173 | 0.0403            | 2.82 |
| p-TiO <sub>2</sub> (1Ag)    | 0.00766                | 0.188 | 0.0333            | 3.07 |
| p-TiO <sub>2</sub> -Ag      | 0.00433                | 0.201 | 0.0199            | 3.27 |
| c-TiO <sub>2</sub>          | 0.00479                | 0.136 | 0.0243            | 2.22 |
| c-TiO <sub>2</sub> (0.03Ag) | 0.00609                | 0.245 | 0.0294            | 4.00 |
| c-TiO <sub>2</sub> (1Ag)    | 0.00840                | 0.251 | 0.0429            | 4.08 |

## References

- [1] Tegze B., Albert E., Fodor B., et al. Photoinduced processes of adsorbed and associated dye molecules in mesoporous titania coatings. *Dyes and Pigments*, **2019**, 167: 109–119.
